# Supplementary material
Source: PubMed Central journal article supplement (PMC2833216)
Supplement: NIHMS154868-supplement-supplement_1.pdf [file NIHMS154868-supplement-supplement_1.pdf]

## **Supplementary Methods**

*Effects of gender on smokers' transcriptome.* Two types of analyses were combined: (i) differentially expressed genes were identified separately for female and male smokers vs. never smokers, employing one-way ANOVA within GeneSpring GX 7 (as described above, except with no multiple testing correction), (ii) the interaction between smoking status and gender was investigated for four comparison groups: never smoker, male; never smoker, female; smoker, male; smoker, female using unbalanced two-way ANOVA with asymptotic P value computation within GeneSpring GX 9 (Agilent Technologies). Genes that were significant in analysis (ii) and at 1.5-fold cutoff in at least one gender group after analysis (i) are shown in Table 3 with associated smoking status and gender interaction P values.

*Comparison of effects of smoking on the oral and bronchial epithelium.*

*Enrichment Analysis.* The distribution of the airway epithelium differentially expressed genes within the entire rank-ordered oral epithelium gene set was scored to identify the relationship between the gene expression responses to tobacco smoke in the oral and airway epithelia, using GSEA v2 (30). Airway genes were collapsed to HUGO symbols and separated into up- and down-regulated gene sets comprising 110 and 21 genes, respectively. Oral data input were the normalized ratio values of all probe sets in HGU133 Plus2 arrays collapsed to HGU133A array with HUGO symbols (the smaller chip was used for previous airway experiments). A reverse analysis was performed by searching for enrichment of airway data in oral gene sets. A significant P value in this analysis suggests that the expression of genes that are affected by smoking status in oral biopsies are also altered in the bronchial epithelium, even if they are not significantly differentially expressed. The core of the airway (and oral) gene sets that account for the enrichment score (30) is defined as the leading-edge subset, and listed in Supplementary Table 5.

**Supplementary Table 1.** Demographic characteristics of never smokers and smokers.

| <b>Never Smokers</b> | Female (N=20)   | Male (N=20) | P value |
|----------------------|-----------------|-------------|---------|
| Age (years)          |                 |             |         |
| Median               | 45              | 45          | 0.51    |
| Range                | (27-66)         | (30-55)     |         |
| <b>Smokers</b>       | Female (N = 19) | Male (N=20) | P value |
| Age (years)          |                 |             |         |
| Median               | 43              | 45.5        | 0.87    |
| Range                | 27-63           | 30-54       |         |
| Pack Years           |                 |             |         |
| Median               | 25              | 32.5        | 0.37    |
| Range                | 15-66           | 15-60       |         |

**Supplementary Table 2.** List of qPCR primers. F and R stand for Forward and Reverse, respectfully.

| Gene Name      | Primers                                                                | Name                                                  |
|----------------|------------------------------------------------------------------------|-------------------------------------------------------|
| <b>S100A7</b>  | F: 5'-AAGCCTGCTGACGATGATGAAGGA-3'<br>R: 5'-ATGGCTCTGCTTGTGGTAGTCTGT-3' | S100 calcium binding protein A7                       |
| <b>CYP1B1</b>  | F: 5'-ACGTACCGGCCACTATCACT-3'<br>R: 5'-CTCGAGTCTGCACATCAGGA-3'         | Cytochrome P450, family 1, subfamily B, polypeptide 1 |
| <b>CYP1A1</b>  | F: 5'-CCTGCTAGGGTTAGGAGGTC-3'<br>R: 5'-GCTCAGCCTAGTTCAAGCAG-3'         | Cytochrome P450, family 1, subfamily A, polypeptide 1 |
| <b>CD207</b>   | F: 5'-CAACAATGCTGGGAACAATG-3'<br>R: 5'-CTGTCCTGTCACGGTTCTGA-3'         | CD 207 molecule, langerin                             |
| <b>CHRNA3</b>  | F: 5'-CTGGGGAGGTGACTTGGATA-3'<br>R: 5'-CAGGAACCGAACTTCATGGT-3'         | Cholinergic receptor, nicotinic, alpha 3              |
| <b>NQO1</b>    | F: 5'-GCCGCAGACCTTGTGATATT-3'<br>R: 5'-TGAACACTCGCTCAAACCAG-3'         | NAD(P)H dehydrogenase, quinone 1                      |
| <b>PTGES</b>   | F: 5'-TGGAGACCATCTACCCC-3'<br>R: 5'-CCACGAGGAAGACCAGGA-3'              | Prostaglandin E synthase                              |
| <b>AHRR</b>    | F: 5'-GTGCGAATCGGAACTGCATGGAAA-3'<br>R: 5'-TCAGTCTGTTCCCTGAGCACCAAA-3' | Aryl-hydrocarbon receptor repressor                   |
| <b>CD1a</b>    | F: 5'-TGGCTGAGTGATTTGCAGAC-3'<br>R: 5'-TTCCTTCCACTCCTCATTGC-3'         | CD1a molecule                                         |
| <b>LEPR</b>    | F: 5'-AGCCAAACTCAACGACACTCTCCT-3'<br>R: 5'-CAATGGTGGGCTGGACCAAGAAAT-3' | Leptin receptor                                       |
| <b>IGF2BP3</b> | F: 5'-AGAAGTGCACGGGAAACCCATAGA-3'<br>R: 5'-TGTTCACTTGCTCACAGCTCTCCA-3' | Insulin-like growth factor 2 mRNA binding protein 3   |

**Supplementary Table 3.** Microarray results (fold-change) indicated that the expression of each of the 11 genes shown below was affected by smoking status (see Table 1). In an attempt to validate the microarray findings, qPCR was carried out on RNA isolated from the oral mucosa of 10 randomly selected smokers and 10 randomly selected never smokers. Fold-changes (smokers vs. never smokers) and P values for qPCR results are shown. For each of the genes, the qPCR findings were qualitatively consistent with the microarray results.

|                       | qPCR<br><i>P</i> value | qPCR<br>Fold | Microarray<br>Fold |
|-----------------------|------------------------|--------------|--------------------|
| <b>S100A7</b>         | 0.04                   | 4.3          | 4.4                |
| <b>CYP1B1</b>         | 0.0004                 | 6.3          | 4.2                |
| <b>CYP1A1</b>         | 0.04                   | 2.5          | 2.5                |
| <b>CD207</b>          | 0.006                  | 2.4          | 1.8                |
| <b>CHRNA3</b>         | 0.02                   | 2.6          | 1.7                |
| <b>NQO1</b>           | 0.02                   | 2.3          | 1.7                |
| <b>PTGES</b>          | 0.047                  | 1.6          | 1.6                |
| <b>AHRR</b>           | 0.001                  | 3.6          | 1.5                |
| <b>CD1a</b>           | 0.01                   | 1.5          | 1.5                |
| <b>LEPR</b>           | 0.049                  | -1.5         | -1.6               |
| <b>IGF2BP3 (IMP3)</b> | 0.03                   | -1.4         | -1.7               |

**Supplementary Table 4.** Differentially expressed genes in the oral mucosa of never smoker females vs. never smoker males and corresponding fold-differences and P values.

| Gene Name       | Affymetrix ID | Fold  | P-value | Gene Title                                            |
|-----------------|---------------|-------|---------|-------------------------------------------------------|
| <b>XIST</b>     | 224588_at     | 48.4  | 5.3E-05 | X (inactive)-specific transcript (non-protein coding) |
| <b>XIST</b>     | 227671_at     | 31.6  | 5.3E-05 | X (inactive)-specific transcript (non-protein coding) |
| <b>XIST</b>     | 221728_x_at   | 18.7  | 1.9E-05 | X (inactive)-specific transcript (non-protein coding) |
| <b>XIST</b>     | 214218_s_at   | 17.1  | 1.9E-05 | X (inactive)-specific transcript (non-protein coding) |
| <b>XIST</b>     | 224590_at     | 13.1  | 2.0E-05 | X (inactive)-specific transcript (non-protein coding) |
| <b>XIST</b>     | 224589_at     | 12.3  | 2.0E-05 | X (inactive)-specific transcript (non-protein coding) |
| ---             | 228919_at     | 4.4   | 1.2E-03 | ---                                                   |
| <b>KDM6A</b>    | 203990_s_at   | 1.6   | 3.0E-02 | lysine (K)-specific demethylase                       |
| <b>KDM6A</b>    | 203991_s_at   | 1.5   | 7.3E-03 | lysine (K)-specific demethylase                       |
| ---             | 234931_at     | -1.9  | 2.0E-04 | ---                                                   |
| <b>DDX3Y</b>    | 205001_s_at   | -2.1  | 2.2E-02 | DEAD (Asp-Glu-Ala-Asp) box polypeptide 3, Y-linked    |
| ---             | 239858_at     | -2.1  | 2.1E-03 | ---                                                   |
| <b>CYorf15B</b> | 223645_s_at   | -2.6  | 7.2E-04 | chromosome Y open reading frame 15B                   |
| <b>CYorf15B</b> | 214131_at     | -2.9  | 7.8E-04 | chromosome Y open reading frame 15B                   |
| <b>CYorf15B</b> | 223646_s_at   | -3.3  | 3.3E-04 | chromosome Y open reading frame 15B                   |
| <b>CYorf15A</b> | 232618_at     | -3.9  | 7.9E-05 | chromosome Y open reading frame 15A                   |
| <b>CYorf14</b>  | 207063_at     | -4.0  | 9.8E-05 | chromosome Y open reading frame 14                    |
| <b>ZFY</b>      | 230760_at     | -4.0  | 9.8E-05 | zinc finger protein, Y-linked                         |
| <b>USP9Y</b>    | 206624_at     | -4.5  | 3.5E-04 | ubiquitin specific peptidase 9, Y-linked              |
| <b>CYorf15A</b> | 236694_at     | -5.0  | 1.6E-04 | chromosome Y open reading frame 15A                   |
| <b>KDM5D</b>    | 206700_s_at   | -6.5  | 8.7E-05 | lysine (K)-specific demethylase 5D                    |
| <b>EIF1AY</b>   | 204410_at     | -6.8  | 6.4E-05 | eukaryotic translation initiation factor 1A, Y-linked |
| <b>USP9Y</b>    | 228492_at     | -7.7  | 8.7E-05 | ubiquitin specific peptidase 9, Y-linked              |
| <b>DDX3Y</b>    | 205000_at     | -10.6 | 2.5E-04 | DEAD (Asp-Glu-Ala-Asp) box polypeptide 3, Y-linked    |
| <b>EIF1AY</b>   | 204409_s_at   | -11.6 | 1.1E-04 | eukaryotic translation initiation factor 1A, Y-linked |
| <b>RPS4Y1</b>   | 201909_at     | -20.0 | 5.4E-04 | ribosomal protein S4, Y-linked                        |

**Supplementary Table 5.** The core members of the airway and oral mucosa genesets that account for the enrichment signal (the ‘leading edge subset’) in the GSEA analysis. The geneset from the oral mucosa of smokers enriched in genes significantly induced in the airway of smokers (P <0.001; marked X in column Oral/Air). Similarly, the geneset from smokers’ airways show enrichment in genes both significantly induced or repressed in the oral mucosa of smokers (P<0.001, induced; P = 0.062, repressed; marked X in column Air/Oral). Opposite enrichment was also detected whereby a geneset from the oral mucosa appears to be induced in smokers but repressed in the smokers’ airway (P=0.005; marked X in section Opposite Enrichment).

| <b>GSEA<br/>INDUCED</b>         | <b>P VALUE</b>                                                                      | <b>Oral/Air<br/>P&lt;0.001</b> | <b>Air/Oral<br/>P &lt;0.001</b> |
|---------------------------------|-------------------------------------------------------------------------------------|--------------------------------|---------------------------------|
| <b>GENE NAME</b>                | <b>DESCRIPTION</b>                                                                  | <b>GSEA</b>                    | <b>GSEA</b>                     |
| ABCB6                           | ATP binding cassette, sub-family B, member 6                                        | X                              |                                 |
| AKR1B10                         | aldo-keto reductase family 1, member B10                                            | X                              |                                 |
| AKR1C1                          | aldo-keto reductase family 1, member C1                                             | X                              |                                 |
| AKR1C2                          | aldo-keto reductase family 1, member C2                                             | X                              |                                 |
| AKR1C3                          | aldo-keto reductase family 1, member C3                                             | X                              |                                 |
| ALDH3A1                         | aldehyde dehydrogenase 3 family, member A1                                          | X                              | X                               |
| CA12                            | Carbonic anhydrase                                                                  | X                              |                                 |
| CEACAM5                         | carcinoembryonic antigen-related cell adhesion molecule                             | X                              |                                 |
| CTSC                            | cathepsin C                                                                         | X                              |                                 |
| CXCL14                          | chemokine (C-X-C motif) ligand 14                                                   | X                              |                                 |
| CYP1A1                          | cytochrome P450, family 1, subfamily A, polypeptide 1                               | X                              | X                               |
| CYP1B1                          | cytochrome P450, family 1, subfamily B, polypeptide 1                               | X                              | X                               |
| FTL                             | ferritin, light polypeptide                                                         | X                              |                                 |
| GDF15                           | growth differentiation factor 15                                                    | X                              |                                 |
| GNP                             | glucosamine (UDP-N-acetyl)-2-epimerase/N-acetylmannosamine kinase                   | X                              |                                 |
| GPX2                            | glutathione peroxidase 2 (gastrointestinal)                                         | X                              | X                               |
| IMPA2                           | inositol(myo)-1(or 4)-monophosphatase 2                                             | X                              |                                 |
| LAPTM4B                         | lysosomal associated protein transmembrane 4 beta                                   | X                              |                                 |
| MSMB                            | microseminoprotein, beta-                                                           | X                              |                                 |
| MUC1                            | mucin 1, cell surface associated                                                    | X                              | X                               |
| NQO1                            | NAD(P)H dehydrogenase, quinone 1                                                    | X                              | X                               |
| PIR                             | pirin (iron-binding nuclear protein)                                                | X                              |                                 |
| SLC7A11                         | solute carrier family 7, member 11                                                  | X                              |                                 |
| TKT                             | transketolase (Wernicke-Korsakoff syndrome)                                         | X                              |                                 |
| TXNDC5                          | thioredoxin domain containing 5                                                     | X                              |                                 |
| TXNRD1                          | thioredoxin reductase 1                                                             | X                              |                                 |
| UGT1A10 ///                     |                                                                                     |                                |                                 |
| UGT1A8 /                        | Na                                                                                  | X                              | X                               |
| UGT1A6                          | UDP glucuronosyltransferase 1 family, polypeptide A6                                | X                              |                                 |
| <b>REPPRESSED</b>               | <b>PVALUE</b>                                                                       | <b>N/A</b>                     | <b>P=0.062</b>                  |
| <b>GENE NAME</b>                | <b>DESCRIPTION</b>                                                                  |                                |                                 |
| CCL18                           | chemokine (C-C motif) ligand 18                                                     |                                | X                               |
| LEPR                            | leptin receptor                                                                     |                                | X                               |
| PEG3                            | paternally expressed 3                                                              |                                | X                               |
| SOX9                            | SRY (Sex determining region Y)-box 9 (campomelic dysplasia, autosomal sex-reversal) |                                | X                               |
| <b>Opposite Enrichment:</b>     |                                                                                     |                                |                                 |
| <b>REPPRESSED in Airway but</b> | <b>INDUCED in Oral Mucosa</b>                                                       | <b>Oral/Air<br/>P= 0.005</b>   |                                 |
|                                 | <b>P VALUE</b>                                                                      | <b>AIR</b>                     | <b>N/A</b>                      |
| <b>GENE NAME</b>                | <b>DESCRIPTION</b>                                                                  | <b>Fold</b>                    |                                 |
| FCGBP                           | Fc fragment of IgG binding protein                                                  | X                              |                                 |
| TMEM45A                         | transmembrane protein 45A                                                           | X                              |                                 |
| FAM107A                         | family with sequence similarity 107, member A                                       | X                              |                                 |
| C3 ///                          |                                                                                     |                                |                                 |
| LOC653879                       | Na                                                                                  | X                              |                                 |
| CYP2F1                          | cytochrome p450, family 2, subfamily F, poypeptide 1                                | X                              |                                 |
| FMO2                            | flavin containing monooxygenase 2 (non-functional)                                  | X                              |                                 |
